# Supplementary material
Source: publisher site journal article supplement (https://www.e-cmh.org/upload/media/cmh-2023-0449-Supplementary-Table-4.pdf)
Supplement: Supplementary file 1 [file cmh-2023-0449-Supplementary-Table-4.pdf]

**Supplementary Table 4.** Discovered DMR list with statistical values

| Seqnames | Start       | End         | Beta   | Pval  | Gene_name | Condition |
|----------|-------------|-------------|--------|-------|-----------|-----------|
| chr3     | 123,166,906 | 123,167,281 | 0.190  | 0.003 | ADCY5     | hyper     |
| chr16    | 4,166,157   | 4,166,601   | 0.157  | 0.031 | ADCY9     | hyper     |
| chr4     | 3,767,519   | 3,768,172   | 0.150  | 0.012 | ADRA2C    | hyper     |
| chr14    | 105,261,718 | 105,262,242 | 0.149  | 0.041 | AKT1      | hyper     |
| chr17    | 36,666,337  | 36,667,046  | 0.123  | 0.027 | ARHGAP23  | hyper     |
| chr17    | 66,255,193  | 66,255,555  | -0.159 | 0.039 | ARSG      | hypo      |
| chr3     | 197,281,606 | 197,282,442 | -0.131 | 0.036 | BDH1      | hypo      |
| chr1     | 39,957,535  | 39,958,075  | 0.096  | 0.049 | BMP8A     | hyper     |
| chr11    | 1,411,501   | 1,412,000   | 0.114  | 0.042 | BRSK2     | hyper     |
| chr11    | 63,530,260  | 63,530,836  | 0.129  | 0.043 | C11orf95  | hyper     |
| chr9     | 139,740,230 | 139,741,651 | 0.065  | 0.033 | C9orf172  | hyper     |
| chr22    | 46,932,382  | 46,933,142  | 0.103  | 0.039 | CELSR1    | hyper     |
| chr19    | 19,006,681  | 19,007,151  | 0.259  | 0.005 | CERS1     | hyper     |
| chr9     | 126,135,337 | 126,135,960 | 0.145  | 0.013 | CRB2      | hyper     |
| chr19    | 47,151,979  | 47,153,125  | 0.115  | 0.002 | DACT3     | hyper     |
| chr11    | 639,507     | 640,146     | 0.074  | 0.045 | DRD4      | hyper     |
| chr6     | 291,972     | 293,392     | -0.083 | 0.049 | DUSP22    | hypo      |
| chr6     | 152,128,584 | 152,129,542 | -0.139 | 0.011 | ESR1      | hypo      |
| chr5     | 176,830,370 | 176,831,517 | -0.105 | 0.022 | F12       | hypo      |
| chr22    | 48,971,269  | 48,971,941  | 0.146  | 0.040 | FAM19A5   | hyper     |
| chr9     | 134,152,041 | 134,152,454 | 0.134  | 0.033 | FAM78A    | hyper     |
| chr3     | 13,590,415  | 13,590,904  | 0.151  | 0.009 | FBLN2     | hyper     |
| chr5     | 180,045,790 | 180,046,398 | 0.200  | 0.003 | FLT4      | hyper     |
| chr22    | 38,220,590  | 38,221,471  | 0.145  | 0.010 | GALR3     | hyper     |
| chr22    | 19,711,419  | 19,711,979  | 0.157  | 0.035 | GP1BB     | hyper     |
| chr19    | 48,946,117  | 48,946,924  | 0.085  | 0.034 | GRIN2D    | hyper     |
| chr10    | 38,645,254  | 38,645,566  | -0.121 | 0.047 | HSD17B7P2 | hypo      |
| chr2     | 96,012,225  | 96,012,698  | 0.158  | 0.029 | KCNIP3    | hyper     |
| chr7     | 127,671,088 | 127,672,093 | 0.118  | 0.008 | LRRC4     | hyper     |
| chr20    | 30,134,808  | 30,135,215  | -0.171 | 0.014 | MCTS2P    | hypo      |
| chr16    | 84,002,039  | 84,002,594  | 0.220  | 0.002 | NECAB2    | hyper     |
| chr4     | 1,400,134   | 1,400,593   | 0.128  | 0.013 | NKX1-1    | hyper     |
| chr8     | 53,851,189  | 53,853,241  | 0.106  | 0.009 | NPBWR1    | hyper     |
| chr19    | 1,753,636   | 1,754,466   | 0.106  | 0.049 | ONECUT3   | hyper     |
| chr15    | 31,775,660  | 31,776,316  | 0.094  | 0.023 | OTUD7A    | hyper     |
| chr14    | 105,780,861 | 105,781,331 | 0.167  | 0.048 | PACS2     | hyper     |
| chr7     | 94,285,993  | 94,286,670  | -0.104 | 0.030 | PEG10     | hypo      |
| chr9     | 96,338,662  | 96,339,294  | 0.149  | 0.026 | PHF2      | hyper     |
| chr22    | 50,355,296  | 50,356,831  | -0.179 | 0.005 | PIM3      | hypo      |
| chr11    | 400,362     | 400,729     | 0.263  | 0.009 | PKP3      | hyper     |
| chr9     | 140,116,412 | 140,116,811 | 0.202  | 0.009 | RNF208    | hyper     |

**Supplementary Table 4.** Continued

| Seqnames | Start       | End         | Beta   | Pval  | Gene_name  | Condition |
|----------|-------------|-------------|--------|-------|------------|-----------|
| chr2     | 241,507,957 | 241,508,288 | 0.189  | 0.030 | RNPEPL1    | hyper     |
| chr3     | 127,795,671 | 127,796,136 | 0.125  | 0.046 | RUVBL1-AS1 | hyper     |
| chr9     | 139,964,409 | 139,964,805 | 0.133  | 0.012 | SAPCD2     | hyper     |
| chr5     | 1,594,125   | 1,594,896   | 0.185  | 0.015 | SDHAP3     | hyper     |
| chr3     | 53,079,250  | 53,079,767  | 0.178  | 0.017 | SFMBT1     | hyper     |
| chr6     | 100,895,066 | 100,897,621 | 0.067  | 0.043 | SIM1       | hyper     |
| chr20    | 62,679,560  | 62,680,033  | 0.120  | 0.048 | SOX18      | hyper     |
| chr2     | 220,312,823 | 220,313,537 | 0.149  | 0.039 | SPEG       | hyper     |
| chr17    | 45,786,298  | 45,786,440  | 0.258  | 0.007 | TBKBP1     | hyper     |
| chr5     | 133,450,421 | 133,450,718 | 0.170  | 0.013 | TCF7       | hyper     |
| chr1     | 29,449,155  | 29,449,711  | -0.117 | 0.046 | TMEM200B   | hypo      |
| chr16    | 1,583,712   | 1,584,348   | -0.170 | 0.009 | TMEM204    | hypo      |
| chr6     | 32,063,931  | 32,064,460  | -0.116 | 0.021 | TNXB       | hypo      |
| chr4     | 1,872,705   | 1,873,333   | 0.160  | 0.034 | WHSC1      | hyper     |
| chr18    | 5,295,101   | 5,295,675   | 0.179  | 0.013 | ZBTB14     | hyper     |
| chr19    | 54,057,415  | 54,058,039  | -0.186 | 0.002 | ZNF331     | hypo      |
| chr8     | 81,786,355  | 81,786,720  | 0.146  | 0.034 | ZNF704     | hyper     |
